# Supplementary material for: Comparison of norovirus genogroup I, II and IV seroprevalence among children in the Netherlands, 1963, 1983 and 2006
Source: PubMed Central journal article supplement (PMC5042128; doi:10.1099/jgv.0.000533), 2016-09
Supplement: jgv-97-2255-s001.pdf [file jgv-97-2255-s001.pdf]

Pre infection

Post infection

A

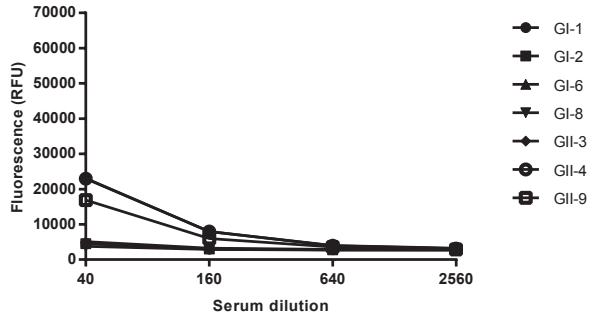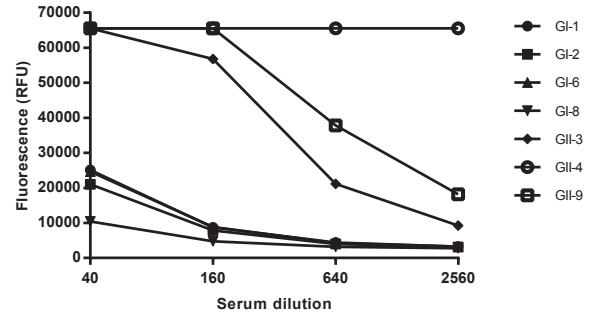

B

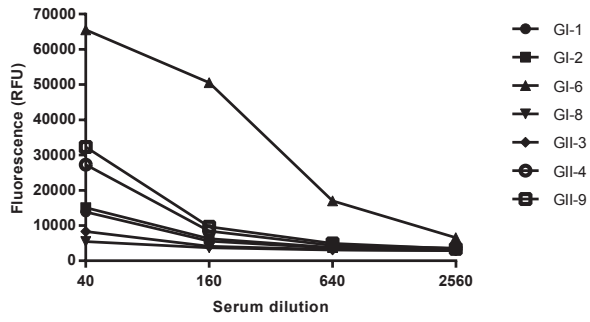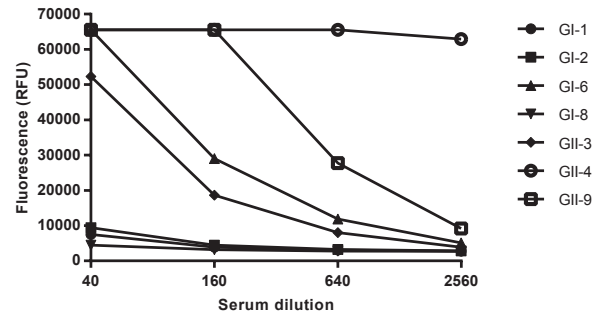

C

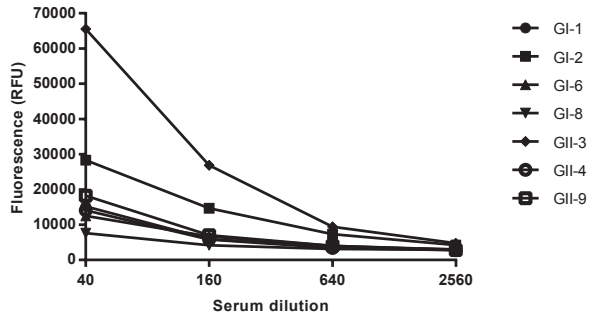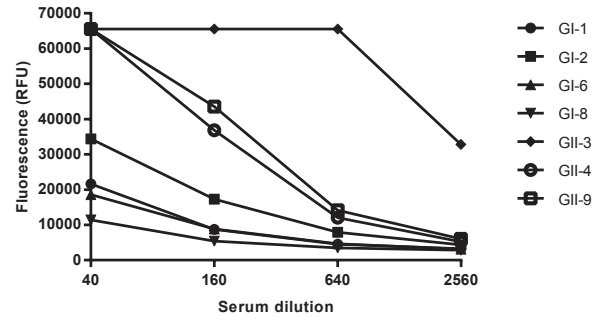

D

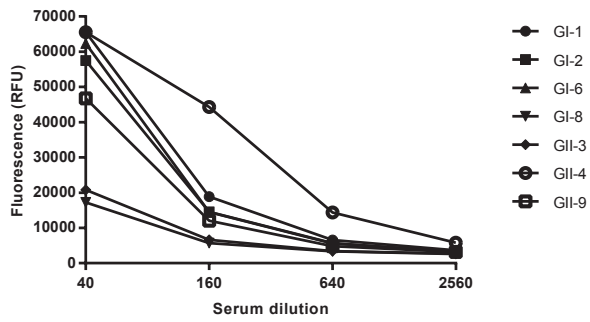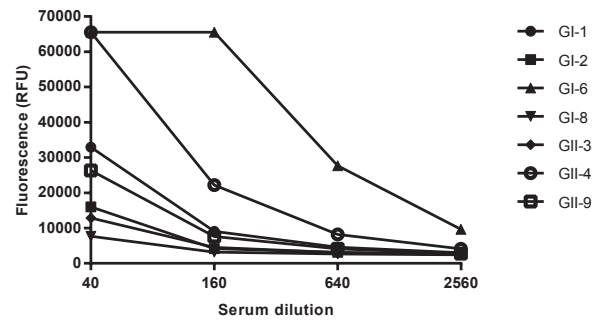

**Supplemental Figure S1** Paired sera of four norovirus RT-PCR confirmed patients (ages 5, 47, 17, and 12 y respectively) infected with GII.4 Den Haag 2006b (A), GII.4 New Orleans 2009 (B), GII.3 (C), or GI.6 (D) tested against 7 different norovirus P particles on the protein array platform.

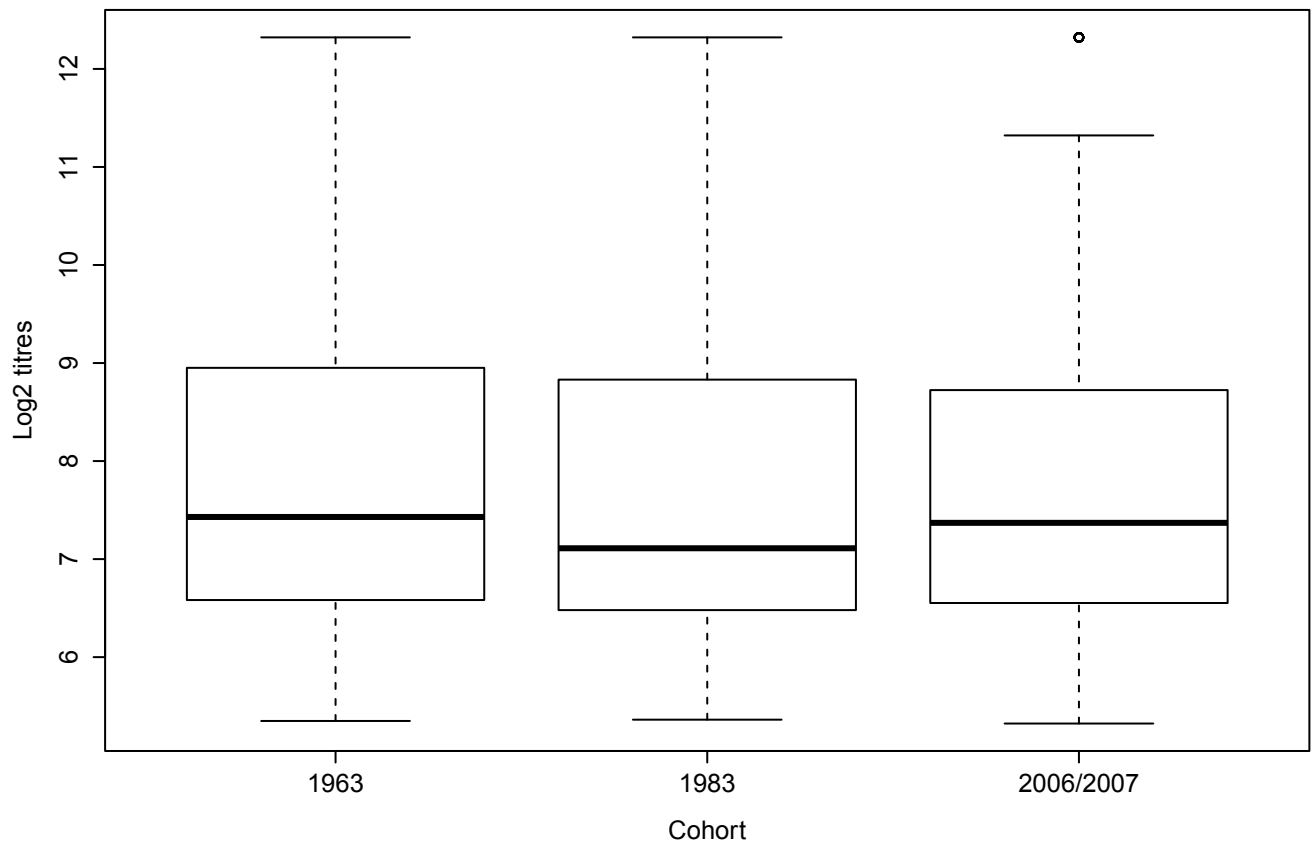

**Supplemental Figure S2** Distribution of positive titres against any antigen among cohorts

**Supplementary Table S1** Recombinant norovirus antigens used to test sera on the protein array platform

| <b>Genotype</b> | <b>Antigen type</b> | <b>Accession number</b> |
|-----------------|---------------------|-------------------------|
| GI.1            | P particle          | M87661                  |
| GI.2            | P particle          | AF435807                |
| GI.6            | P particle          | AF538678                |
| GI.8            | P particle          | AF538679                |
| GII.3           | P particle          | U22498                  |
| GII.4           | P particle          | AY038600                |
| GII.9           | P particle          | AY038599                |
| GIV.1           | VLP                 | AF414427                |
